# Supplementary material for: Severity of COVID-19–Related Illness in Massachusetts, July 2021 to December 2022
Source: PubMed Central journal article supplement (PMC10102873; doi:10.1001/jamanetworkopen.2023.8203), 2023-04-13
Supplement: jamanetwopen-e238203-s002.pdf [file jamanetwopen-e238203-s002.pdf]

## Data Sharing Statement

Azhir. Severity of COVID-19-Related Illness in Massachusetts, July 2021 to December 2022. *JAMA Netw Open*. Published April 13, 2023. doi:10.1001/jamanetworkopen.2023.8203

### Data

**Data available:** No

### Additional Information

**Explanation for why data not available:** The data was extracted from Mass General Brigham's COVID-19 Data Mart Enclave and Covid-19 Vaccine Registry. Due to privacy regulations and per institutional and IRB approvals for this study, the patient level data cannot be shared.
